# Supplementary material for: Perioperative Magnesium for Postoperative Analgesia: An Umbrella Review of Systematic Reviews and Updated Meta-Analysis of Randomized Controlled Trials
Source: MDPI journal article supplement (doi:10.3390/jpm11121273), 2021-12-02
Supplement: s1 [file s1]

## Figure S1 PRISMA flow diagram of updated meta-analysis

**Figure S2** Forest plot showing resting pain score at postoperative 0 h in adult patients. The figure depicts individual trials as filled squares with relative sample size and the 95% confidence interval (CI) of the difference as a solid line. The diamond shape indicates the pooled estimate and uncertainty for the combined effect.

**Figure S3** Forest plot showing resting pain score at postoperative 0-1 h in adult patients. The figure depicts individual trials as filled squares with relative sample size and the 95% confidence interval (CI) of the difference as a solid line. The diamond shape indicates the pooled estimate and uncertainty for the combined effect.

**Figure S4** Forest plot showing resting pain score at postoperative 0-4 h in adult patients. The figure depicts individual trials as filled squares with relative sample size and the 95% confidence interval (CI) of the difference as a solid line. The diamond shape indicates the pooled estimate and uncertainty for the combined effect.

**Figure S5** Forest plot showing resting pain score at postoperative 24 h in adult patients. The figure depicts individual trials as filled squares with relative sample size and the 95% confidence interval (CI) of the difference as a solid line. The diamond shape indicates the pooled estimate and uncertainty for the combined effect.

**Figure S6** Forest plot showing dynamic pain score at postoperative 0 h in adult patients. The figure depicts individual trials as filled squares with relative sample size and the 95% confidence interval (CI) of the difference as a solid line. The diamond shape indicates the pooled estimate and uncertainty for the combined effect.

**Figure S7** Forest plot showing dynamic pain score at postoperative 0-1 h in adult patients. The figure depicts individual trials as filled squares with relative sample size and the 95% confidence interval (CI) of the difference as a solid line. The diamond shape indicates the pooled estimate and uncertainty for the combined effect.

**Figure S8** Forest plot showing dynamic pain score at postoperative 4 h in adult patients. The figure depicts individual trials as filled squares with relative sample size and the 95% confidence interval (CI) of the difference as a solid line. The diamond shape indicates the pooled estimate and uncertainty for the combined effect.

**Figure S9** Forest plot showing dynamic pain score at postoperative 0-4 h in adult patients. The figure depicts individual trials as filled squares with relative sample size and the 95% confidence interval (CI) of the difference as a solid line. The diamond shape indicates the pooled estimate and uncertainty for the combined effect.

**Figure S10** Forest plot showing dynamic pain score at postoperative 24 h in adult patients. The figure depicts individual trials as filled squares with relative sample size and the 95% confidence interval (CI) of the difference as a solid line. The diamond shape indicates the pooled estimate and uncertainty for the combined effect.

**Figure S11** Forest plot showing pain score at postoperative 0 h in pediatric patients. The figure depicts individual trials as filled squares with relative sample size and the 95% confidence interval (CI) of the difference as a solid line. The diamond shape indicates the pooled estimate and uncertainty for the combined effect.

**Figure S12** Forest plot showing pain score at postoperative 0-1 h in pediatric patients. The figure depicts individual trials as filled squares with relative sample size and the 95% confidence interval (CI) of the difference as a solid line. The diamond shape indicates the pooled estimate and uncertainty for the combined effect.

**Figure S13** Forest plot showing pain score at postoperative 4 h in pediatric patients. The figure depicts individual trials as filled squares with relative sample size and the 95% confidence interval (CI) of the difference as a solid line. The diamond shape indicates the pooled estimate and uncertainty for the combined effect.

**Figure S14** Forest plot showing pain score at postoperative 0-4 h in pediatric patients. The figure depicts individual trials as filled squares with relative sample size and the 95% confidence interval (CI) of the difference as a solid line. The diamond shape indicates the pooled estimate and uncertainty for the combined effect.

**Figure S15** Forest plot showing pain score at postoperative 24 h in pediatric patients. The figure depicts individual trials as filled squares with relative sample size and the 95% confidence interval (CI) of the difference as a solid line. The diamond shape indicates the pooled estimate and uncertainty for the combined effect.

**Figure S16** Forest plot showing time to first analgesic in pediatric patients. The figure depicts individual trials as filled squares with relative sample size and the 95% confidence interval (CI) of the difference as a solid line. The diamond shape indicates the pooled estimate and uncertainty for the combined effect.

**Figure S17** Forest plot showing analgesic consumption in pediatric patients. The figure depicts individual trials as filled squares with relative sample size and the 95% confidence interval (CI) of the difference as a solid line. The diamond shape indicates the pooled estimate and uncertainty for the combined effect.

**Figure S18** TSA for resting pain score at postoperative 0 h in adult patients. Complete blue line represents the cumulative Z curve, etched red line represents conventional test boundary, complete outer red line represents the trial sequential monitoring boundary, and complete inner red line represents futility boundary. The cumulative Z curve crossed the conventional test boundary and the trial sequential monitoring boundary.

**Figure S19** TSA for resting pain score at postoperative 24 h in adult patients. Complete blue line represents the cumulative Z curve, etched red line represents conventional test boundary, complete outer red line represents the trial sequential monitoring boundary, and complete

inner red line represents futility boundary. The cumulative  $Z$  curve crossed the conventional test boundary and the trial sequential monitoring boundary.

**Figure S20** TSA for dynamic pain score at postoperative 0 h in adult patients. Complete blue line represents the cumulative  $Z$  curve, etched red line represents conventional test boundary. Trial sequential monitoring boundary is ignored due to too little information use. The cumulative  $Z$  curve did not cross the conventional boundary.

**Figure S21** TSA for dynamic pain score at postoperative 4 h in adult patients. Complete blue line represents the cumulative  $Z$  curve, etched red line represents conventional test boundary, complete outer red line represents the trial sequential monitoring boundary, and complete inner red line represents futility boundary. The cumulative  $Z$  curve crossed the conventional test boundary and the trial sequential monitoring boundary.

**Figure S22** TSA for dynamic pain score at postoperative 24 h in adult patients. Complete blue line represents the cumulative  $Z$  curve, etched red line represents conventional test boundary, complete outer red line represents the trial sequential monitoring boundary, and complete inner red line represents futility boundary. The cumulative  $Z$  curve crossed the conventional test boundary and the trial sequential monitoring boundary.

**Figure S23** TSA for pain score at postoperative 0 h in pediatric patients. Complete blue line represents the cumulative  $Z$  curve, etched red line represents conventional test boundary, and complete inner red line represents futility boundary. Trial sequential monitoring boundary is ignored due to too little information use. The cumulative  $Z$  curve did not cross the conventional boundary.

**Figure S24** TSA for pain score at postoperative 4 h in pediatric patients. Complete blue line represents the cumulative Z curve, etched red line represents conventional test boundary, complete outer red line represents the trial sequential monitoring boundary, and complete inner red line represents futility boundary. The cumulative Z curve crossed the conventional test boundary but did not cross the trial sequential monitoring boundary.

**Figure S25** TSA for pain score at postoperative 24 h in pediatric patients. Complete blue line represents the cumulative Z curve, etched red line represents conventional test boundary, complete outer red line represents the trial sequential monitoring boundary, and complete inner red line represents futility boundary. The cumulative Z curve did not cross the conventional boundary.

.

**Figure S26** TSA for the time to first analgesic in pediatric patients. Complete blue line represents the cumulative Z curve, etched red line represents conventional test boundary, complete outer red line represents the trial sequential monitoring boundary, and complete inner red line represents futility boundary. The cumulative Z curve crossed the conventional test boundary but did not cross the trial sequential monitoring boundary.

**Figure S27** TSA for the analgesic consumption in pediatric patients. Complete blue line represents the cumulative Z curve, etched red line represents conventional test boundary, complete outer red line represents the trial sequential monitoring boundary, and complete inner red line represents futility boundary. The cumulative Z curve crossed the conventional test boundary but did not cross the trial sequential monitoring boundary.

**Figure S28** TSA for the incidence of rescue analgesic in pediatric patients. Complete blue line represents the cumulative Z curve, etched red line represents conventional test boundary, complete outer red line represents the trial sequential monitoring boundary, and complete

inner red line represents futility boundary. The cumulative  $Z$  curve crossed the conventional test boundary and the trial sequential monitoring boundary.

**Figure S29** Funnel for resting pain score at postoperative 0 h in adult patients. White circles: comparisons included. Black circles: inputted comparisons using the trim-and-fill method. White diamond: pooled observed log risk ratio. Black diamond: pooled inputted log risk ratio.

**Figure S30** Funnel for resting pain score at postoperative 0-1 h in adult patients. White circles: comparisons included. Black circles: inputted comparisons using the trim-and-fill method. White diamond: pooled observed log risk ratio. Black diamond: pooled inputted log risk ratio.

**Figure S31** Funnel for resting pain score at postoperative 4 h in adult patients. White circles: comparisons included. Black circles: inputted comparisons using the trim-and-fill method. White diamond: pooled observed log risk ratio. Black diamond: pooled inputted log risk ratio.

**Figure S32** Funnel for resting pain score at postoperative 0-4 h in adult patients. White circles: comparisons included. Black circles: inputted comparisons using the trim-and-fill method. White diamond: pooled observed log risk ratio. Black diamond: pooled inputted log risk ratio.

**Figure S33** Funnel for resting pain score at postoperative 24 h in adult patients. White circles: comparisons included. Black circles: inputted comparisons using the trim-and-fill method. White diamond: pooled observed log risk ratio. Black diamond: pooled inputted log risk ratio.

**Figure S34** Funnel for dynamic pain score at postoperative 0 h in adult patients. White circles: comparisons included. Black circles: inputted comparisons using the trim-and-fill method. White diamond: pooled observed log risk ratio. Black diamond: pooled inputted log risk ratio.

**Figure S35** Funnel for dynamic pain score at postoperative 0-1 h in adult patients. White circles: comparisons included. Black circles: inputted comparisons using the trim-and-fill method. White diamond: pooled observed log risk ratio. Black diamond: pooled inputted log risk ratio.

**Figure S36** Funnel for dynamic pain score at postoperative 4 h in adult patients. White circles: comparisons included. Black circles: inputted comparisons using the trim-and-fill method. White diamond: pooled observed log risk ratio. Black diamond: pooled inputted log risk ratio.

**Figure S37** Funnel for dynamic pain score at postoperative 0-4 h in adult patients. White circles: comparisons included. Black circles: inputted comparisons using the trim-and-fill method. White diamond: pooled observed log risk ratio. Black diamond: pooled inputted log risk ratio.

**Figure S38** Funnel for dynamic pain score at postoperative 24 h in adult patients. White circles: comparisons included. Black circles: inputted comparisons using the trim-and-fill method. White diamond: pooled observed log risk ratio. Black diamond: pooled inputted log risk ratio.

**Figure S39** Funnel for the time to first analgesic in adult patients. White circles: comparisons included. Black circles: inputted comparisons using the trim-and-fill method. White diamond: pooled observed log risk ratio. Black diamond: pooled inputted log risk ratio.

**Figure S40** Funnel for the analgesic consumption in adult patients. White circles: comparisons included. Black circles: inputted comparisons using the trim-and-fill method. White diamond: pooled observed log risk ratio. Black diamond: pooled inputted log risk ratio.

**Figure S41** Funnel for pain score at postoperative 0 h in pediatric patients. White circles: comparisons included. Black circles: inputted comparisons using the trim-and-fill method. White diamond: pooled observed log risk ratio. Black diamond: pooled inputted log risk ratio.

**Figure S42** Funnel for pain score at postoperative 0-1 h in pediatric patients. White circles: comparisons included. Black circles: inputted comparisons using the trim-and-fill method.



White diamond: pooled observed log risk ratio. Black diamond: pooled inputted log risk ratio.

**Figure S43** Funnel for pain score at postoperative 4 h in pediatric patients. White circles: comparisons included. Black circles: inputted comparisons using the trim-and-fill method. White diamond: pooled observed log risk ratio. Black diamond: pooled inputted log risk ratio.

**Figure S44** Funnel for pain score at postoperative 0-4 h in pediatric patients. White circles: comparisons included. Black circles: inputted comparisons using the trim-and-fill method. White diamond: pooled observed log risk ratio. Black diamond: pooled inputted log risk ratio.

**Figure S45** Funnel for pain score at postoperative 24 h in pediatric patients. White circles: comparisons included. Black circles: inputted comparisons using the trim-and-fill method. White diamond: pooled observed log risk ratio. Black diamond: pooled inputted log risk ratio.
