# Supplementary material for: Perioperative Magnesium for Postoperative Analgesia: An Umbrella Review of Systematic Reviews and Updated Meta-Analysis of Randomized Controlled Trials
Source: MDPI journal article supplement (doi:10.3390/jpm11121273), 2021-12-02
Supplement: s1 [file s1]

## Ovid-Medline

|                      |    | Search term                 | Number of reference |
|----------------------|----|-----------------------------|---------------------|
| Study design<br>(SD) | 1  | exp systematic review/      | 171760              |
|                      | 2  | systematic review.ab,ti.    | 161599              |
|                      | 3  | systematic review.mp        | 191484              |
|                      | 4  | systemic review.mp          | 1541                |
|                      | 5  | exp meta-analysis as topic/ | 23378               |
|                      | 6  | meta-analysis.ab,ti.        | 152301              |
|                      | 7  | metaanalysis.ab,ti.         | 1568                |
|                      | 8  | pooled analysis.mp.         | 8829                |
|                      | 9  | or/1-8                      | 283999              |
| Population<br>(P)    | 10 | exp General Surgery/        | 39985               |
|                      | 11 | Surg\$.mp.                  | 3090005             |
|                      | 12 | Oper\$.mp.                  | 1174027             |
|                      | 13 | perioper\$.mp.              | 105530              |
|                      | 14 | postoper\$.mp.              | 839310              |
|                      | 15 | preoper\$.mp.               | 316620              |
|                      | 16 | exp Anesthesia/             | 198460              |
|                      | 17 | Anesth\$.mp.                | 387485              |
|                      | 18 | Anaesth\$.mp.               | 100506              |
|                      | 19 | or/10-18                    | 4063331             |
| Intervention<br>(I)  | 20 | exp magnesium/              | 68494               |
|                      | 21 | magnesium.mp.               | 102523              |
|                      | 22 | magnesium.mp.               | 51578               |
|                      | 23 | Or/20-22                    | 102523              |
| SD and P and<br>I    | 24 | 9 and 19 and 23             | 136                 |

## Ovid-embase

|                      |     | Search term                                              | Number of reference |
|----------------------|-----|----------------------------------------------------------|---------------------|
| Study design<br>(SD) | #1  | 'systematic review'/exp OR 'systematic review'           | 405056              |
|                      | #2  | systematic AND review                                    | 482177              |
|                      | #3  | systemic AND review                                      | 183703              |
|                      | #4  | 'meta analysis'/exp                                      | 229091              |
|                      | #5  | 'meta analysis' OR 'metaanalysis'                        | 338083              |
|                      | #6  | #1 OR #2 OR #3 OR #4 OR #5                               | 790762              |
| Population<br>(P)    | #7  | 'general surgery'/exp                                    | 19097               |
|                      | #8  | surg\$:ti,ab                                             | 32235               |
|                      | #9  | operat\$:ti,ab                                           | 52563               |
|                      | #10 | perioper\$:ti,ab                                         | 109                 |
|                      | #11 | postoper\$:ti,ab                                         | 302                 |
|                      | #12 | preoper\$.ti,ab                                          | 333                 |
|                      | #13 | 'anesthesia'/exp                                         | 388885              |
|                      | #14 | anesth\$:ti,ab                                           | 569                 |
|                      | #15 | anaesth\$ ti,ab                                          | 575                 |
|                      | #16 | #7 OR #8 OR #9 OR #10 OR #11 OR #12 OR #13 OR #14 OR #15 | 491944              |
| Intervention<br>(I)  | #17 | 'magnesium'/exp                                          | 96671               |
|                      | #18 | magnesium.ti,ab                                          | 76454               |
|                      | #19 | magnesium.ab,ti.                                         | 183617              |
|                      | #20 | #17 OR #18 OR #19                                        | 183617              |
| SD and P and I       | #21 | #6 AND #16 AND #20                                       | 238                 |
