# Supplementary material for: Perioperative Magnesium for Postoperative Analgesia: An Umbrella Review of Systematic Reviews and Updated Meta-Analysis of Randomized Controlled Trials
Source: MDPI journal article supplement (doi:10.3390/jpm11121273), 2021-12-02
Supplement: s1 [file s1]

## Ovid-Medline

|                      |    | Search term                                                               | Number of reference |
|----------------------|----|---------------------------------------------------------------------------|---------------------|
| Study design<br>(SD) | 1  | randomized controlled trial.pt                                            | 549294              |
|                      | 2  | randomized controlled trial\$.mp                                          | 736532              |
|                      | 3  | controlled clinical trial.pt                                              | 94504               |
|                      | 4  | controlled clinical trial\$.mp                                            | 124427              |
|                      | 5  | random allocation.mp                                                      | 107627              |
|                      | 6  | exp double-blind method/                                                  | 168124              |
|                      | 7  | double-blind.mp                                                           | 195841              |
|                      | 8  | exp single-blind method/                                                  | 31145               |
|                      | 9  | single-blind.mp                                                           | 35747               |
|                      | 10 | or/1-9                                                                    | 954619              |
|                      | 11 | clinical trial.pt                                                         | 531433              |
|                      | 12 | clinical trial\$.mp                                                       | 1025453             |
|                      | 13 | exp clinical trial/                                                       | 916124              |
|                      | 14 | (clin\$ adj25 trial\$.mp                                                  | 1096343             |
|                      | 15 | ((singl\$ or doubl\$ or tripl\$ or trebl\$) adj25 (blind\$ or mask\$)).mp | 241869              |
|                      | 16 | random\$.mp                                                               | 1319531             |
|                      | 17 | exp research design/                                                      | 471005              |
|                      | 18 | research design.mp                                                        | 145864              |
|                      | 19 | or/11-18                                                                  | 2151583             |
|                      | 20 | 10 or 19                                                                  | 2151583             |
|                      | 21 | Case report.tw.                                                           | 265861              |
|                      | 22 | Letter.pt.                                                                | 1107388             |
|                      | 23 | Historical article.pt.                                                    | 366349              |
|                      | 24 | Review.pt.                                                                | 2635723             |
|                      | 25 | or/21-24                                                                  | 4292576             |
|                      | 26 | 20 not 25                                                                 | 1788967             |
| Population (P)       | 27 | exp General Surgery/                                                      | 39985               |
|                      | 28 | Surg\$.mp.                                                                | 3090005             |
|                      | 29 | Oper\$.mp.                                                                | 1174027             |
|                      | 30 | perioper\$.mp.                                                            | 105530              |
|                      | 31 | postoper\$.mp.                                                            | 839310              |
|                      | 32 | preoper\$.mp.                                                             | 316620              |
|                      | 33 | exp Anesthesia/                                                           | 198460              |
|                      | 34 | Anesth\$.mp.                                                              | 387485              |
|                      | 35 | Anaesth\$.mp.                                                             | 100506              |
|                      | 36 | or/27-35                                                                  | 4063331             |
| Intervention<br>(I)  | 37 | exp magnesium/                                                            | 68494               |
|                      | 38 | magnesium.mp.                                                             | 102523              |
|                      | 39 | magnesium.ab,ti.                                                          | 51578               |
|                      | 40 | Or/37-39                                                                  | 102523              |
| SD and P and I       | 41 | 26 and 36 and 40                                                          | 949                 |

## Ovid-embase

|                      |     | Search term                                                 | Number of reference |
|----------------------|-----|-------------------------------------------------------------|---------------------|
| Study design<br>(SD) | #1  | randomi?ed AND controlled AND trial\$                       | 1037348             |
|                      | #2  | 'controlled clinical trial (topic)'/exp                     | 222481              |
|                      | #3  | controlled:ti,ab AND clinical:ti,ab AND trials:ti,ab        | 119660              |
|                      | #4  | controlled AND clinical AND trial\$                         | 1389787             |
|                      | #5  | 'randomization'/exp                                         | 92492               |
|                      | #6  | 'random allocation'/exp                                     | 92492               |
|                      | #7  | random AND allocation                                       | 5696                |
|                      | #8  | 'double blind':ti,ab                                        | 208353              |
|                      | #9  | 'single blind':ti,ab                                        | 20072               |
|                      | #10 | #1 OR #2 OR #3 OR #4 OR #5 OR #6 OR #7 OR #8 OR #9          | 1646204             |
|                      | #11 | 'clinical trial (topic)'/exp                                | 372059              |
|                      | #12 | clinical AND trial\$                                        | 2390191             |
|                      | #13 | random\$                                                    | 381481              |
|                      | #14 | rct                                                         | 49833               |
|                      | #15 | #11 OR #12 OR #13 OR #14                                    | 2791568             |
|                      | #16 | #10 OR #15                                                  | 2954870             |
|                      | #17 | 'case study'/exp                                            | 81925               |
|                      | #18 | 'case report'/exp                                           | 2759590             |
|                      | #19 | 'abstract report'/exp                                       | 89796               |
|                      | #20 | 'letter'/exp                                                | 1131275             |
|                      | #21 | #17 OR #18 OR #19 OR #20                                    | 3825854             |
|                      | #22 | #16 NOT #21                                                 | 2840480             |
| Population (P)       | #23 | 'general surgery'/exp                                       | 19097               |
|                      | #24 | surg\$:ti,ab                                                | 32235               |
|                      | #25 | operat\$:ti,ab                                              | 52563               |
|                      | #26 | perioper\$:ti,ab                                            | 109                 |
|                      | #27 | postoper\$:ti,ab                                            | 302                 |
|                      | #28 | preoper\$.ti,ab                                             | 333                 |
|                      | #29 | 'anesthesia'/exp                                            | 388885              |
|                      | #30 | anesth\$:ti,ab                                              | 569                 |
|                      | #31 | anaesth\$ ti,ab                                             | 575                 |
|                      | #32 | #23 OR #24 OR #25 OR #26 OR #27 OR #28 OR #29 OR #30 OR #31 | 491944              |
| Intervention<br>(I)  | #33 | 'magnesium'/exp                                             | 96671               |
|                      | #34 | magnesium                                                   | 76454               |
|                      | #35 | magnesium                                                   | 183617              |
|                      | #36 | #33 OR #34 OR #35                                           | 183617              |
| SD and P and I       | #37 | #22 AND #32 AND #36                                         | 779                 |

## Cochrane

|   | Search term                                         | Number of reference |
|---|-----------------------------------------------------|---------------------|
| 1 | MeSH descriptor [General Surgery] explode all trees | 362                 |
| 2 | MeSH descriptor [Anesthesia] explode all trees      | 20061               |
| 3 | MeSH descriptor [Magnesium] explode all trees       | 1210                |
| 4 | (#1 OR #2)AND #3                                    | 30                  |
