# Supplementary material for: Perioperative Magnesium for Postoperative Analgesia: An Umbrella Review of Systematic Reviews and Updated Meta-Analysis of Randomized Controlled Trials
Source: J Pers Med. 2021 Dec 2;11(12):1273. doi: 10.3390/jpm11121273 (PMC8708823; doi:10.3390/jpm11121273)
Supplement: Supplementary file 1 [file jpm-11-01273-s001.zip]

Archive with 49 entries (49 files):
- S1.jpg
- S10.wmf
- S11.wmf
- S12.wmf
- S13.wmf
- S14.wmf
- S15.wmf
- S16.wmf
- S17.wmf
- S18.pdf
- S19.pdf
- S2.wmf
- S20.pdf
- S21.pdf
- S22.pdf
- S23.pdf
- S24.pdf
- S25.pdf
- S26.pdf
- S27.pdf
- S28.pdf
- S29.wmf
- S3.wmf
- S30.wmf
- S31.wmf
- S32.wmf
- S33.wmf
- S34.wmf
- S35.wmf
- S36.wmf
- S37.wmf
- S38.wmf
- S39.wmf
- S4.wmf
- S40.wmf
- S41.wmf
- S42.wmf
- S43.wmf
- S44.wmf
- S45.wmf
- S5.wmf
- S6.wmf
- S7.wmf
- S8.wmf
- S9.wmf
- Supplementary figure legend.pdf
- Supplementary File S1_PRISMA checklist.pdf
- Supplementary file S2_search term_umbrella review.pdf
- Supplementary file S3_search term_updated meta-analysis.pdf
