# Supplementary figures and images for: Perioperative Magnesium for Postoperative Analgesia: An Umbrella Review of Systematic Reviews and Updated Meta-Analysis of Randomized Controlled Trials
Source: MDPI journal article supplement (doi:10.3390/jpm11121273), 2021-12-02

# Alpha-spending Boundaries is a Two-sided graph

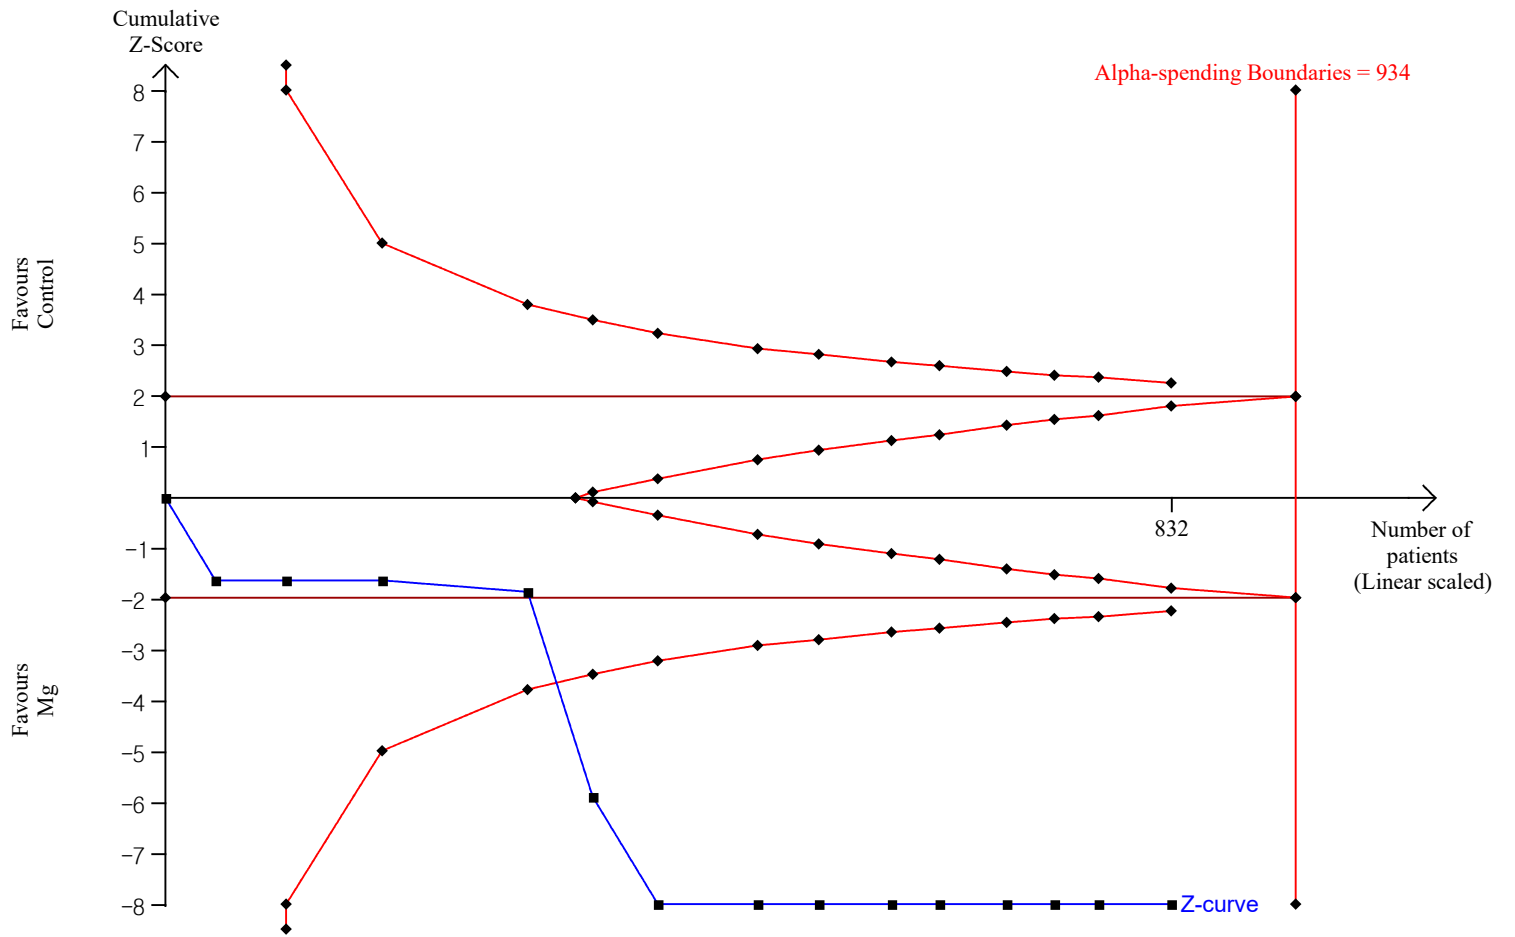

Supplement: s1 [file s1]

# Alpha-spending Boundaries is a Two-sided graph

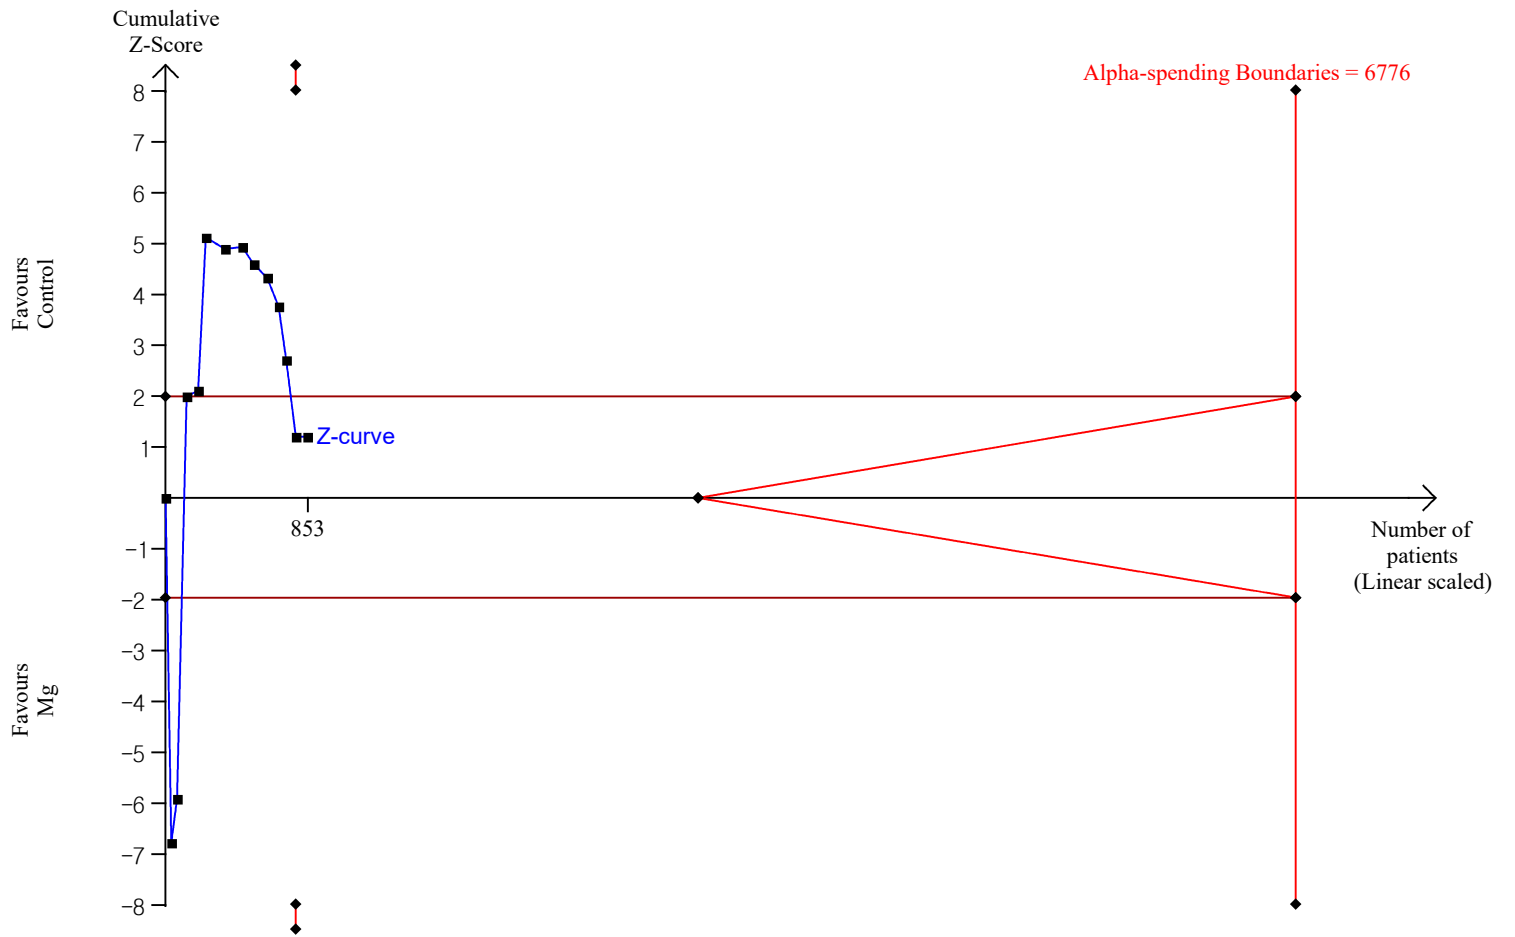

Supplement: s1 [file s1]

# Alpha-spending Boundaries is a Two-sided graph

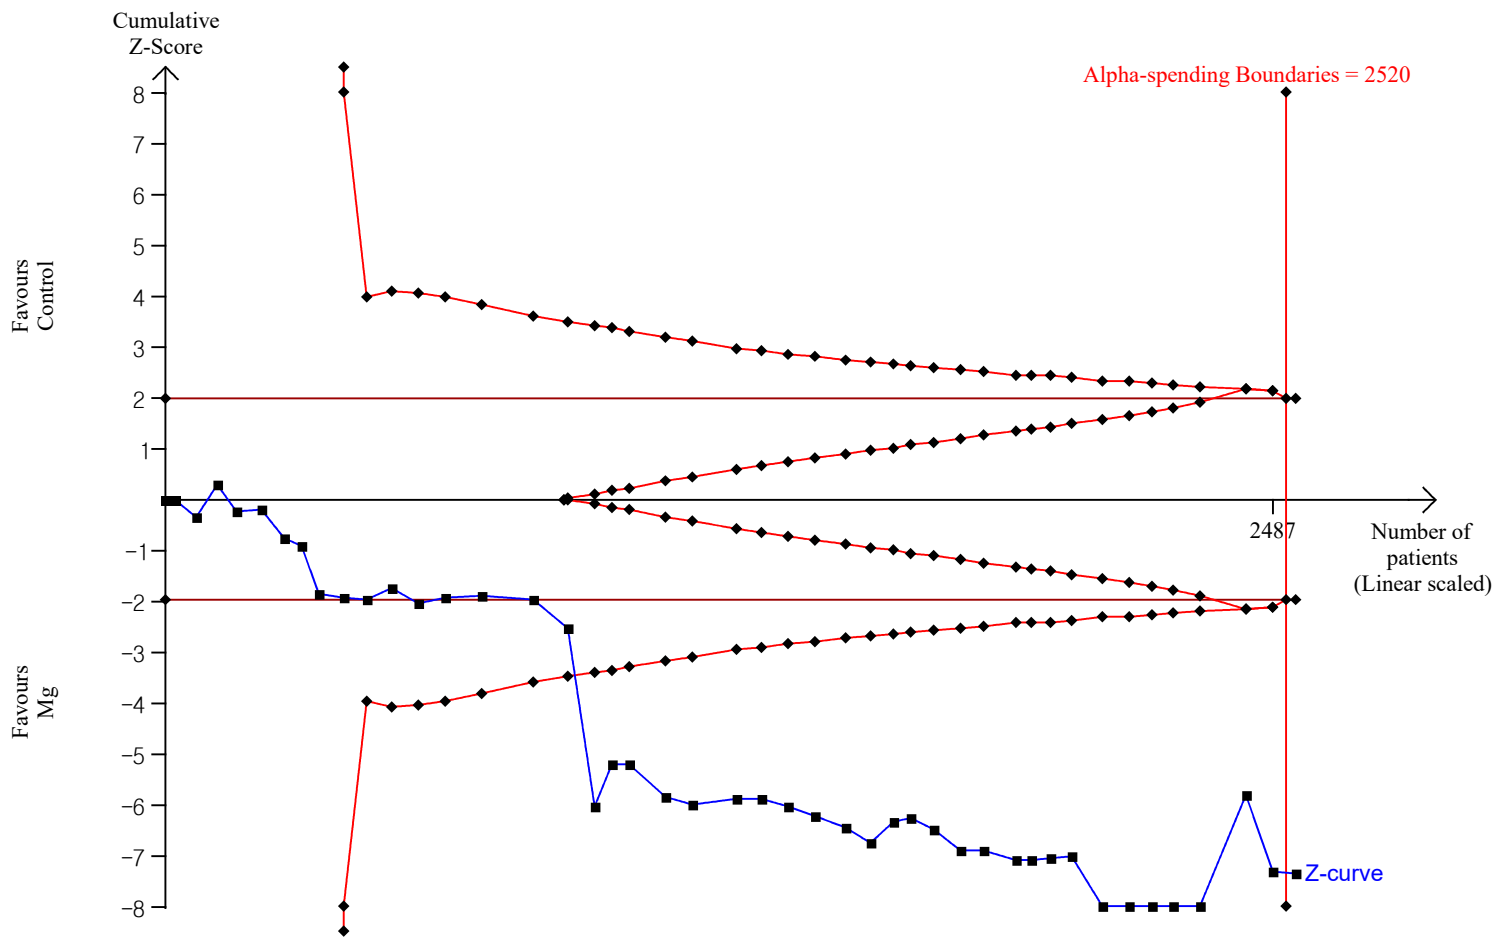

Supplement: s1 [file s1]

Alpha-spending Boundaries is a Two-sided graph

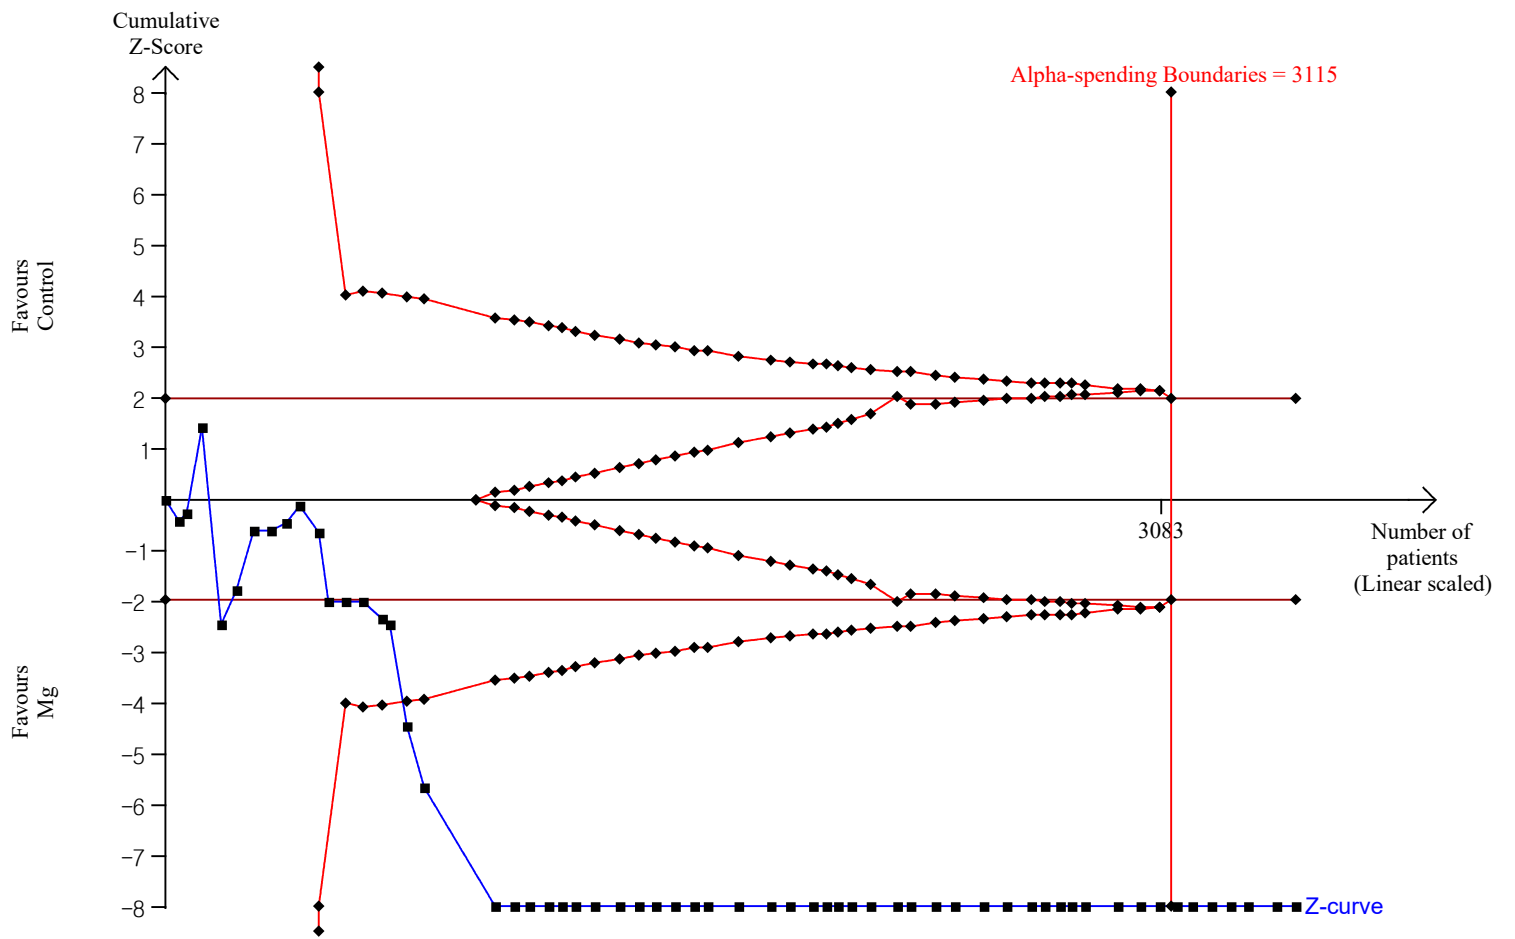

Supplement: s1 [file s1]

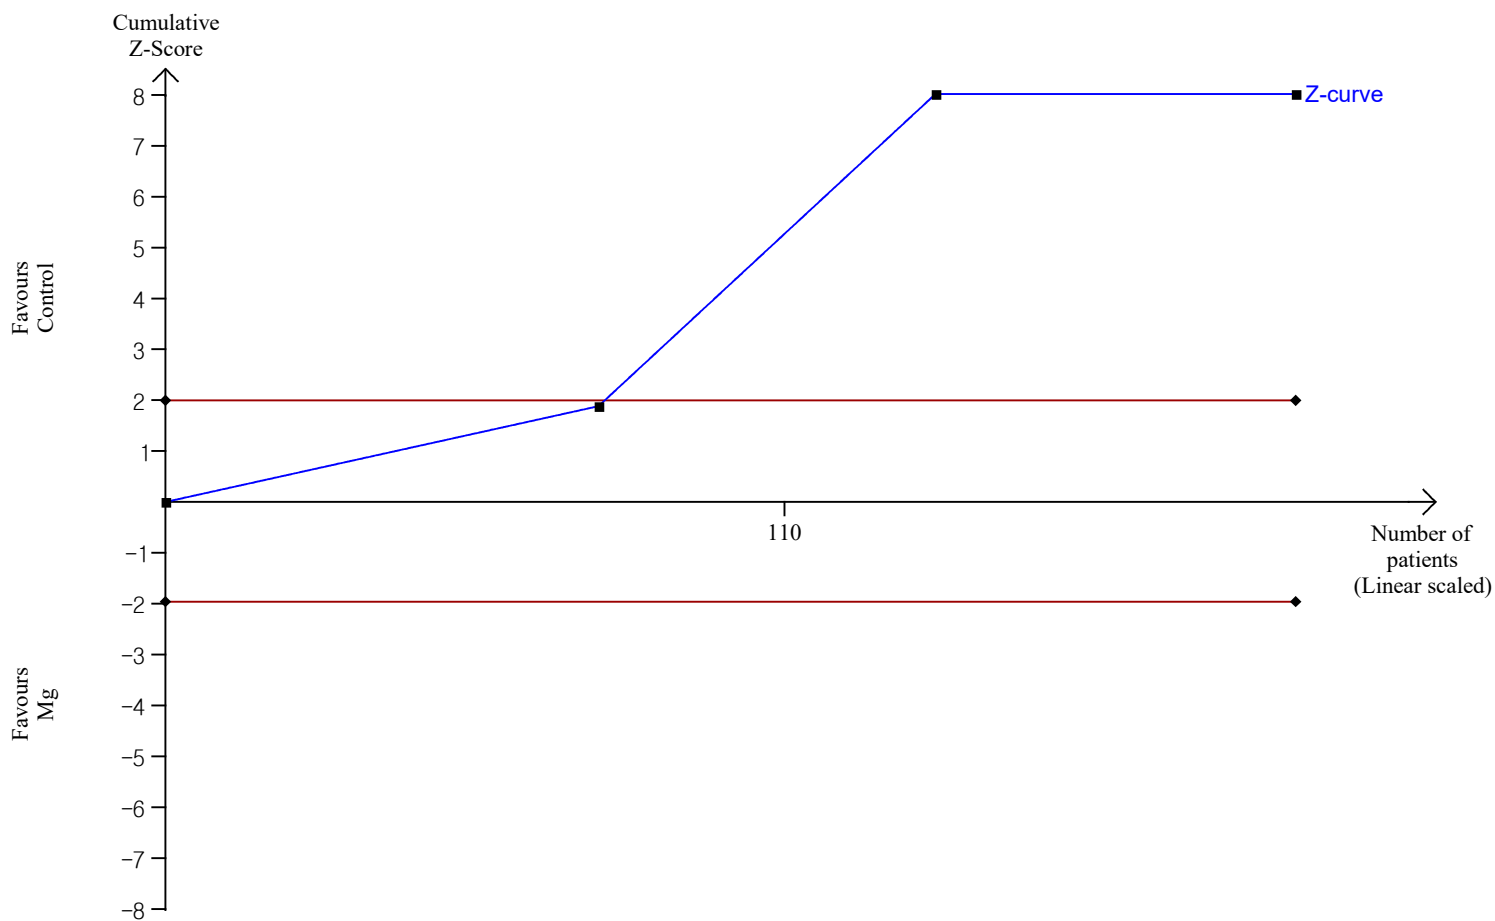

Supplement: s1 [file s1]

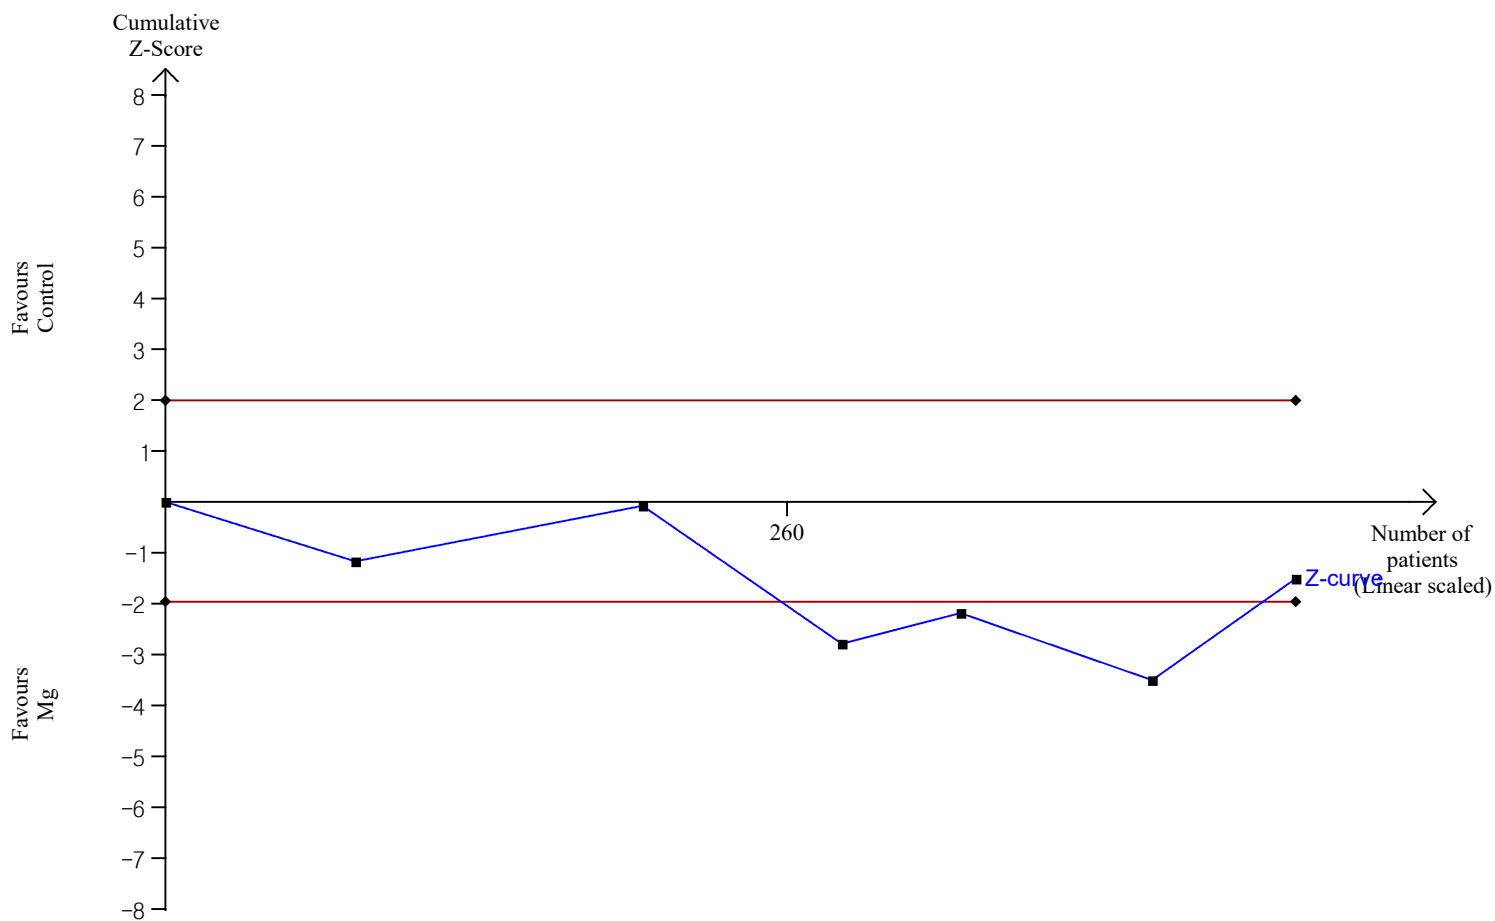

Supplement: s1 [file s1]

# Alpha-spending Boundaries is a Two-sided graph

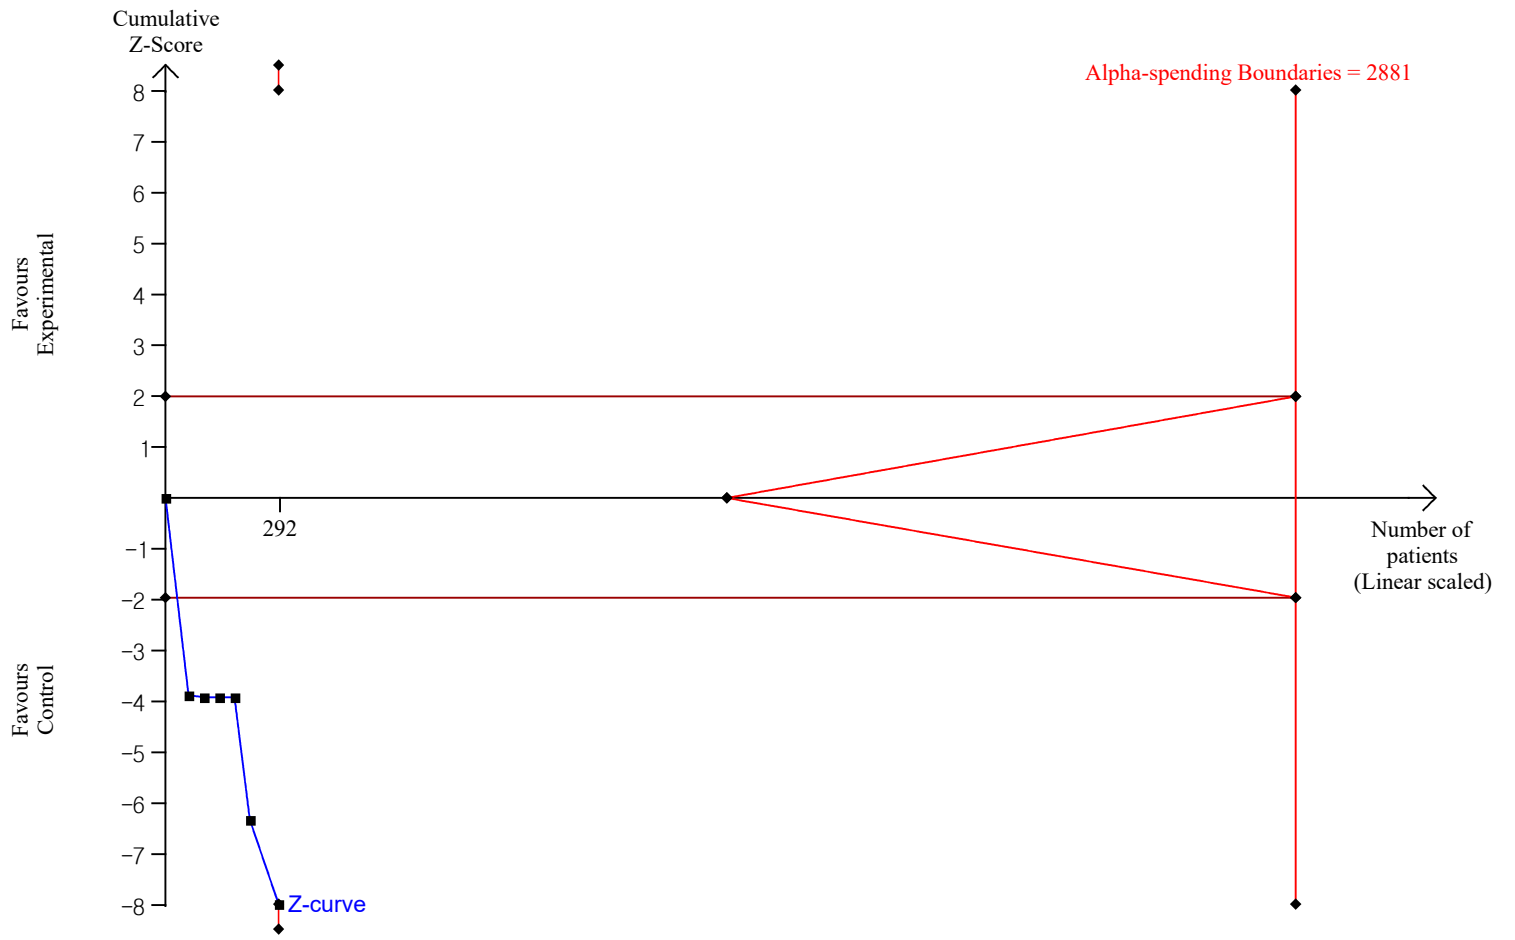

Supplement: s1 [file s1]

# Alpha-spending Boundaries is a Two-sided graph

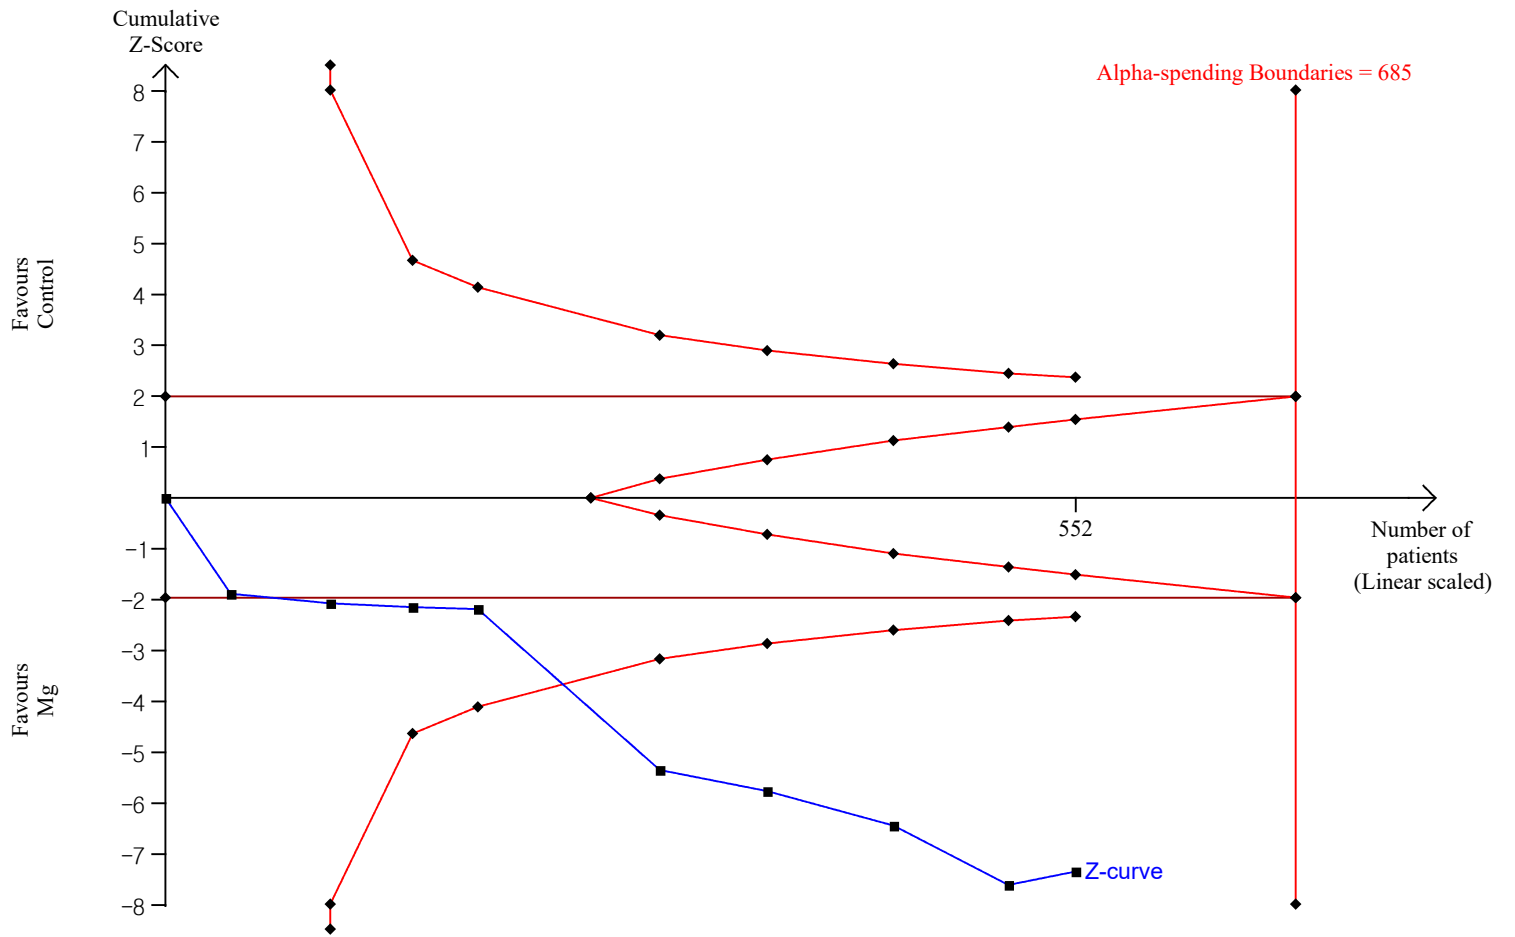

Supplement: s1 [file s1]

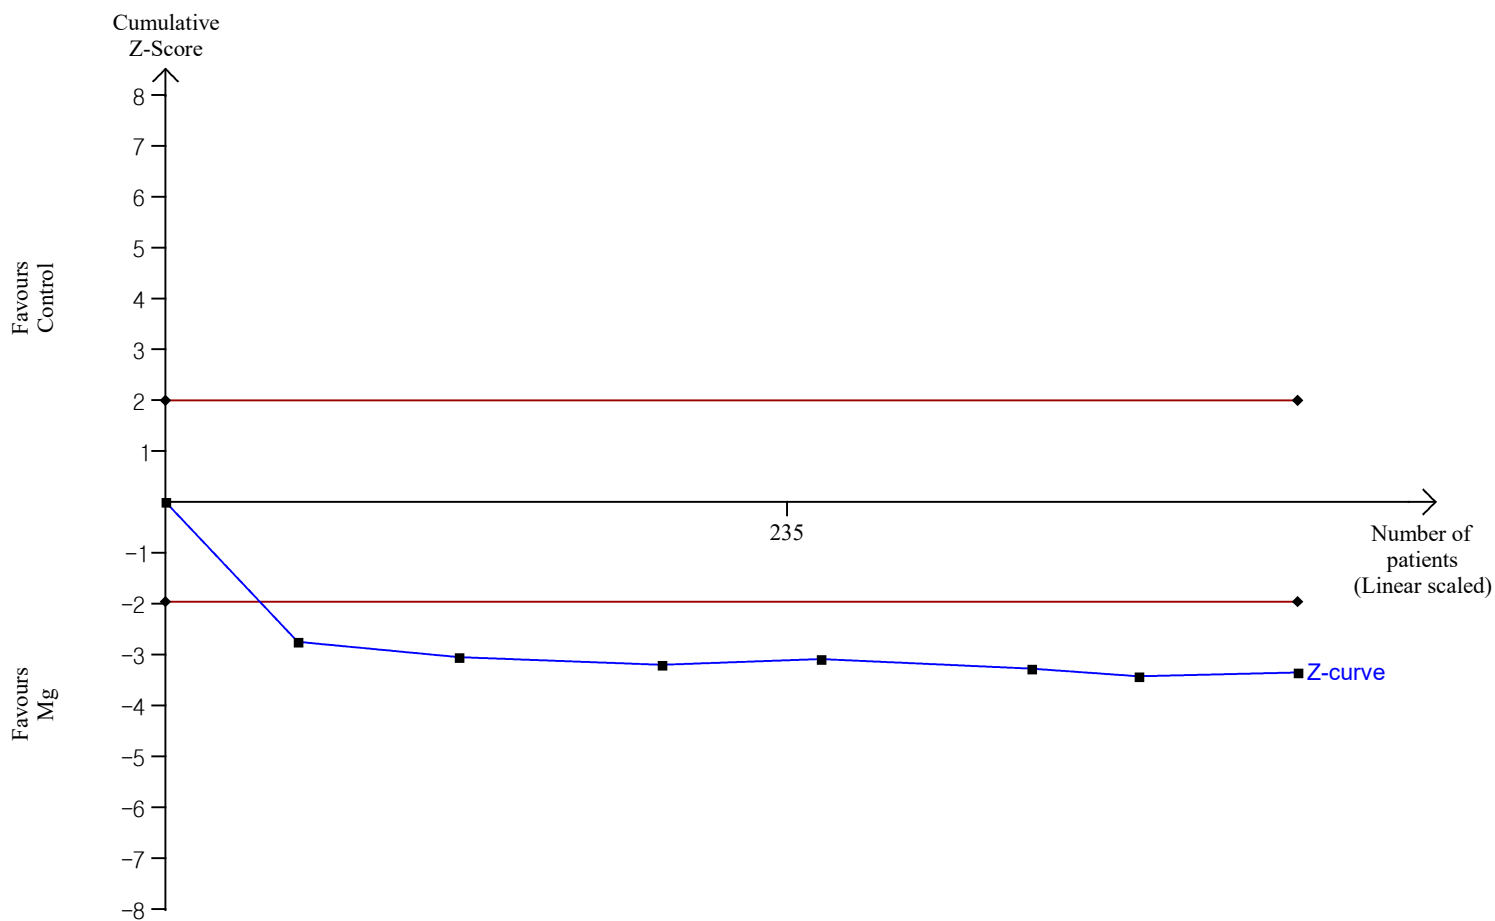

Supplement: s1 [file s1]

# Alpha-spending Boundaries is a Two-sided graph

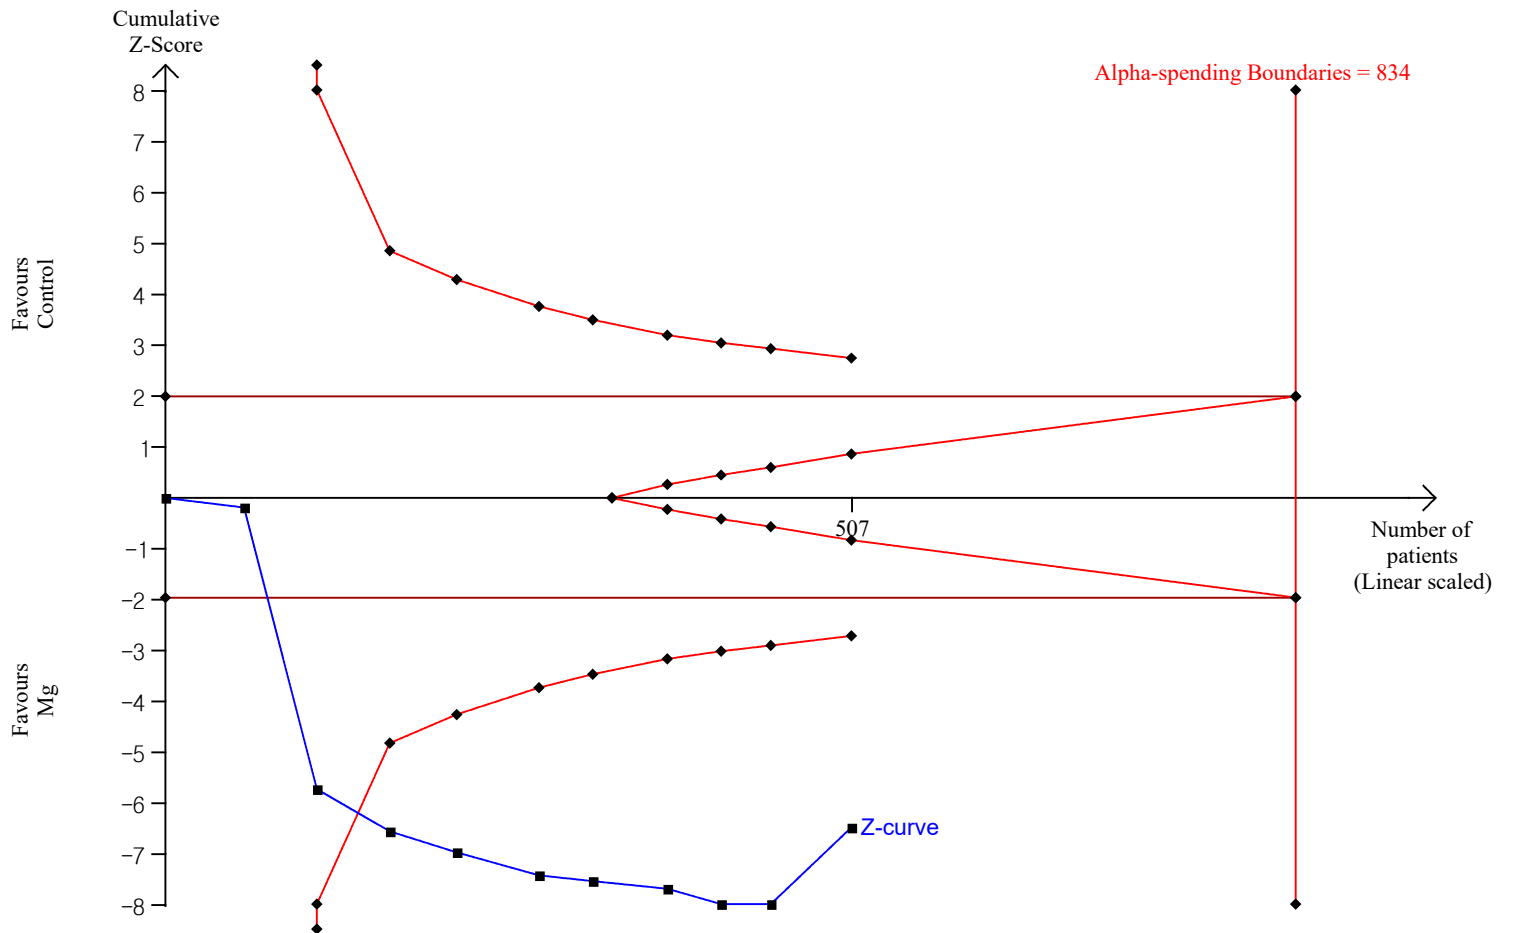

Supplement: s1 [file s1]

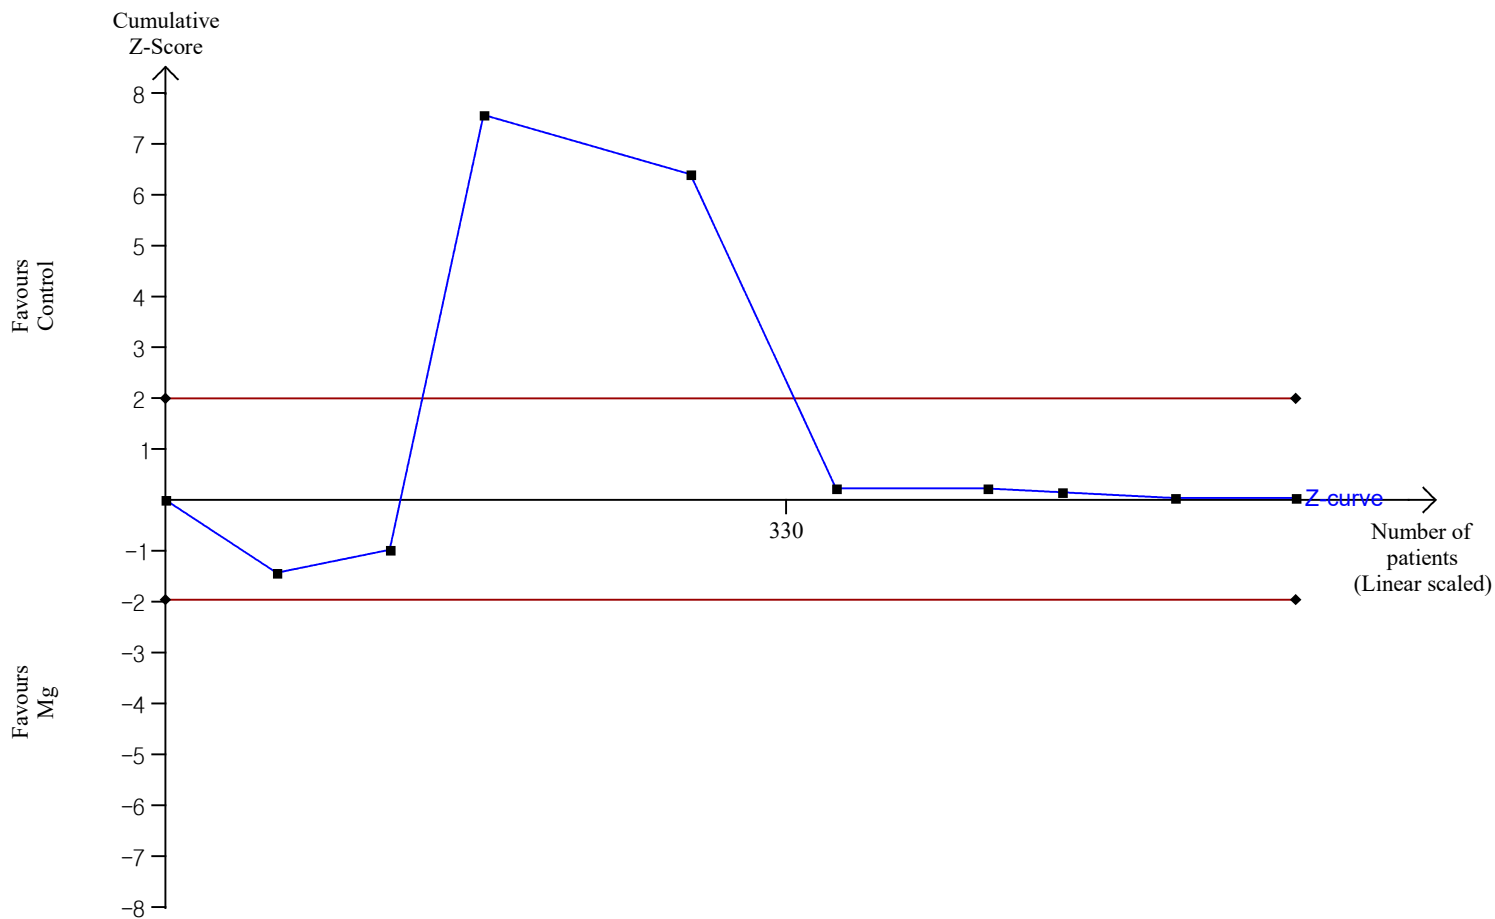

Supplement: s1 [file s1]
